# Supplementary material
Source: Research Square preprint supplement (doi:10.21203/rs.3.rs-8921874/v1)
Supplement: Supplementary file 1 [file 3a70df3b9758f88461c823a1.docx]

# **Supplementary 1**

**LISA Cluster Classification of Provinces by Study Periods, 2005-2024**

This table provides complete year-by-year classification of all provinces showing statistically significant local spatial autocorrelation (P < 0.05), organized by cluster type: High-High (HH) = disease hotspots with high incidence surrounded by high; High-Low (HL) = spatial outliers with high incidence surrounded by low; Low-Low (LL) = cold spots with low incidence surrounded by low; Low-High (LH) = potential buffer zones with low incidence surrounded by high. Dash (-) indicates no significant provinces in that category for that year.

| **Period** | **HH** | **HL** | **LL** | **LH** |
| --- | --- | --- | --- | --- |
| 2005–2008 | Ratchaburi, Phetchaburi, Samut Songkhram, Samut Sakhon, Samut Prakan, Nakhon Phanom, Nonthaburi, Bangkok, Nakhon Nayok, Chachoengsao, Sa Kaeo | Roi Et | Phayao, Loei, Nong Bua Lam Phu, Nong Khai, Udon Thani, Khon Kaen, Sakon Nakhon, Kalasin, Mukdahan, Amnat Charoen | Ayutthaya,  Pathum Thani, Chon Buri |
| 2009–2012 | Chon Buri, Rayong, Sa Kaeo, Chanthaburi, Trat, Nakhon Si Thammarat | Mukdahan, Lop Buri | Suphan Buri, Ang Thong, Nong Bua Lam Phu, Nong Khai, Udon Thani, Sakon Nakhon, Khon Kaen, Loei | Surat Thani, Phuket, Trang, Yala |
| 2013–2016 | Mae Hong Son, Chiang Mai, Lamphun | Uthai Thani | Sukhothai, Phitsanulok, Nong Khai, Bungkan, Udon Thani, Lop Buri, Suphan Buri | - |
| 2017–2020 | Chanthaburi | Chiang Rai, Bungkan | Nan, Udon Thani, Sakon Nakhon | - |
| 2021–2024 | Chiang Mai, Phayao | Ubon Ratchathani | Nong Bua Lam Phu, Udon Thani, Bungkan, Sakon Nakhon, Nakhon Phanom, Kalasin, Maha Sarakham, Mukdahan, Loei,  Yasothon, Nakhon Sawan, Uthai Thani, Chai Nat, Lop Buri, Suphan Buri, Ang Thong, Saraburi, Nakhon Nayok | - |
